# Supplementary material for: Optimization of Raw Ewes’ Milk High-Pressure Pre-Treatment for Improved Production of Raw Milk Cheese
Source: Foods. 2022 Feb 1;11(3):435. doi: 10.3390/foods11030435 (PMC8834186; doi:10.3390/foods11030435)
Supplement: Supplementary file 1 [file foods-11-00435-s001.zip › foods-1557645-supplementary.pdf]

## Supplementary Material

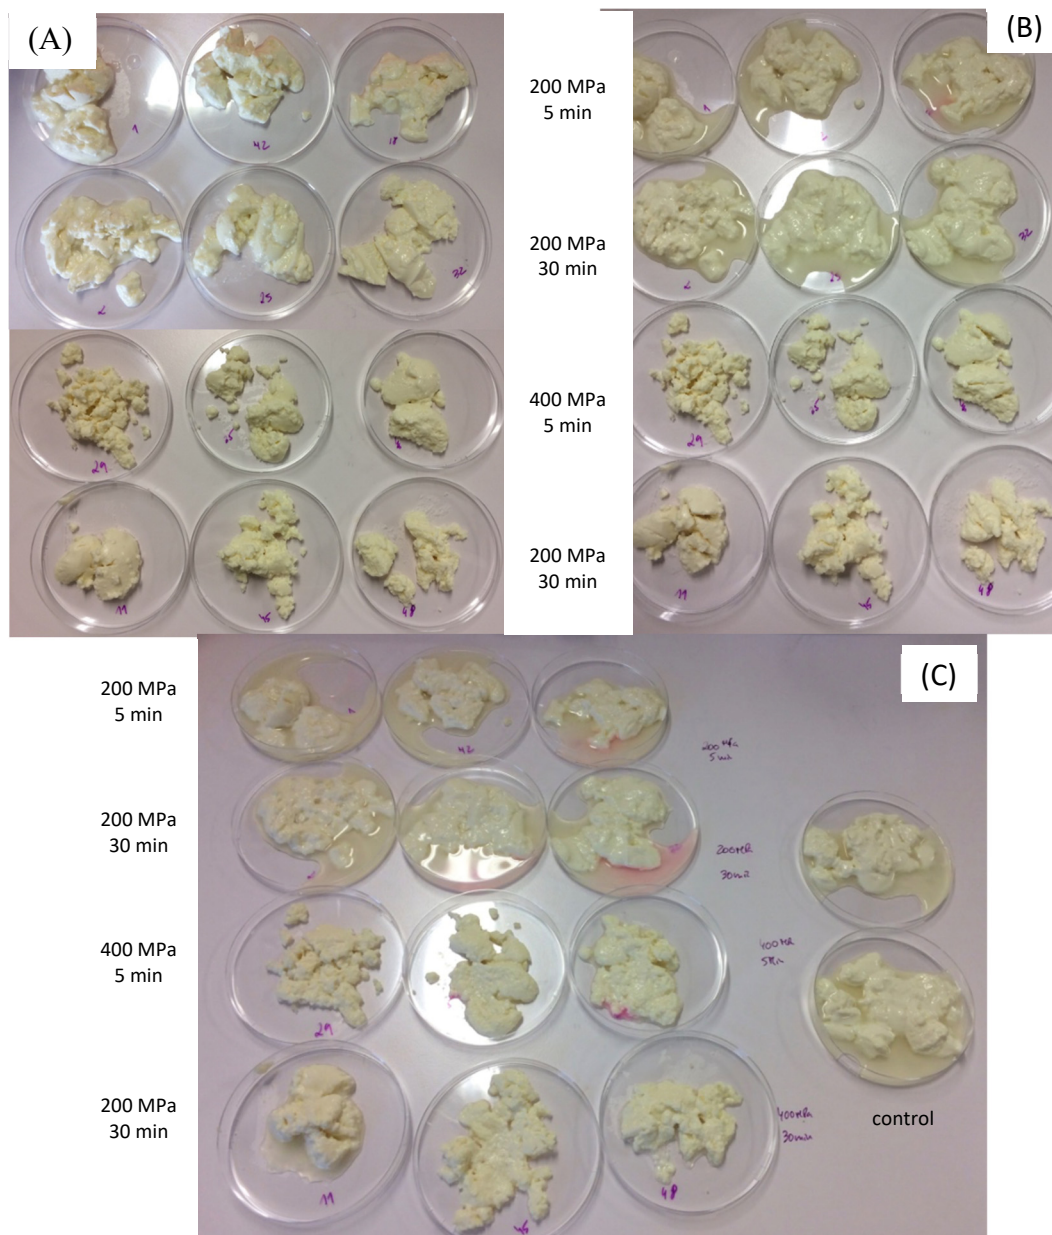

**Figure S1.** First screening: curds obtained from milk HPP at different conditions: (A) after centrifugation and whey separation – 0 h; (B) after 2 h; and (C) after 24 h.

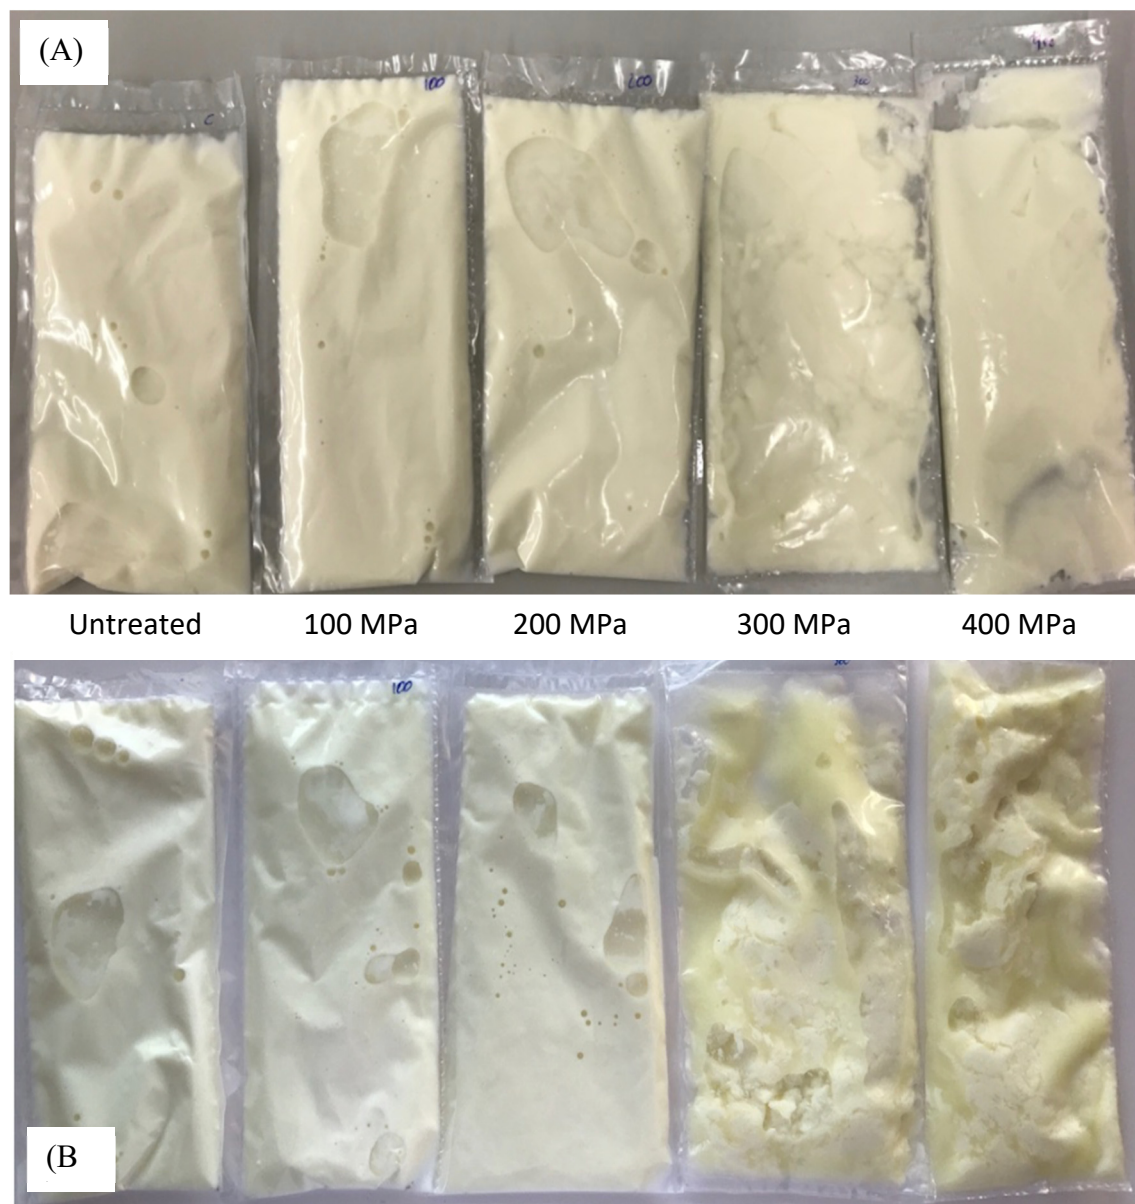

**Figure S2.** Second screening: milk bags (A) 1 h after HPP at 100, 200, 300 and 400 MPa for 5 min; (B) after 24 h.

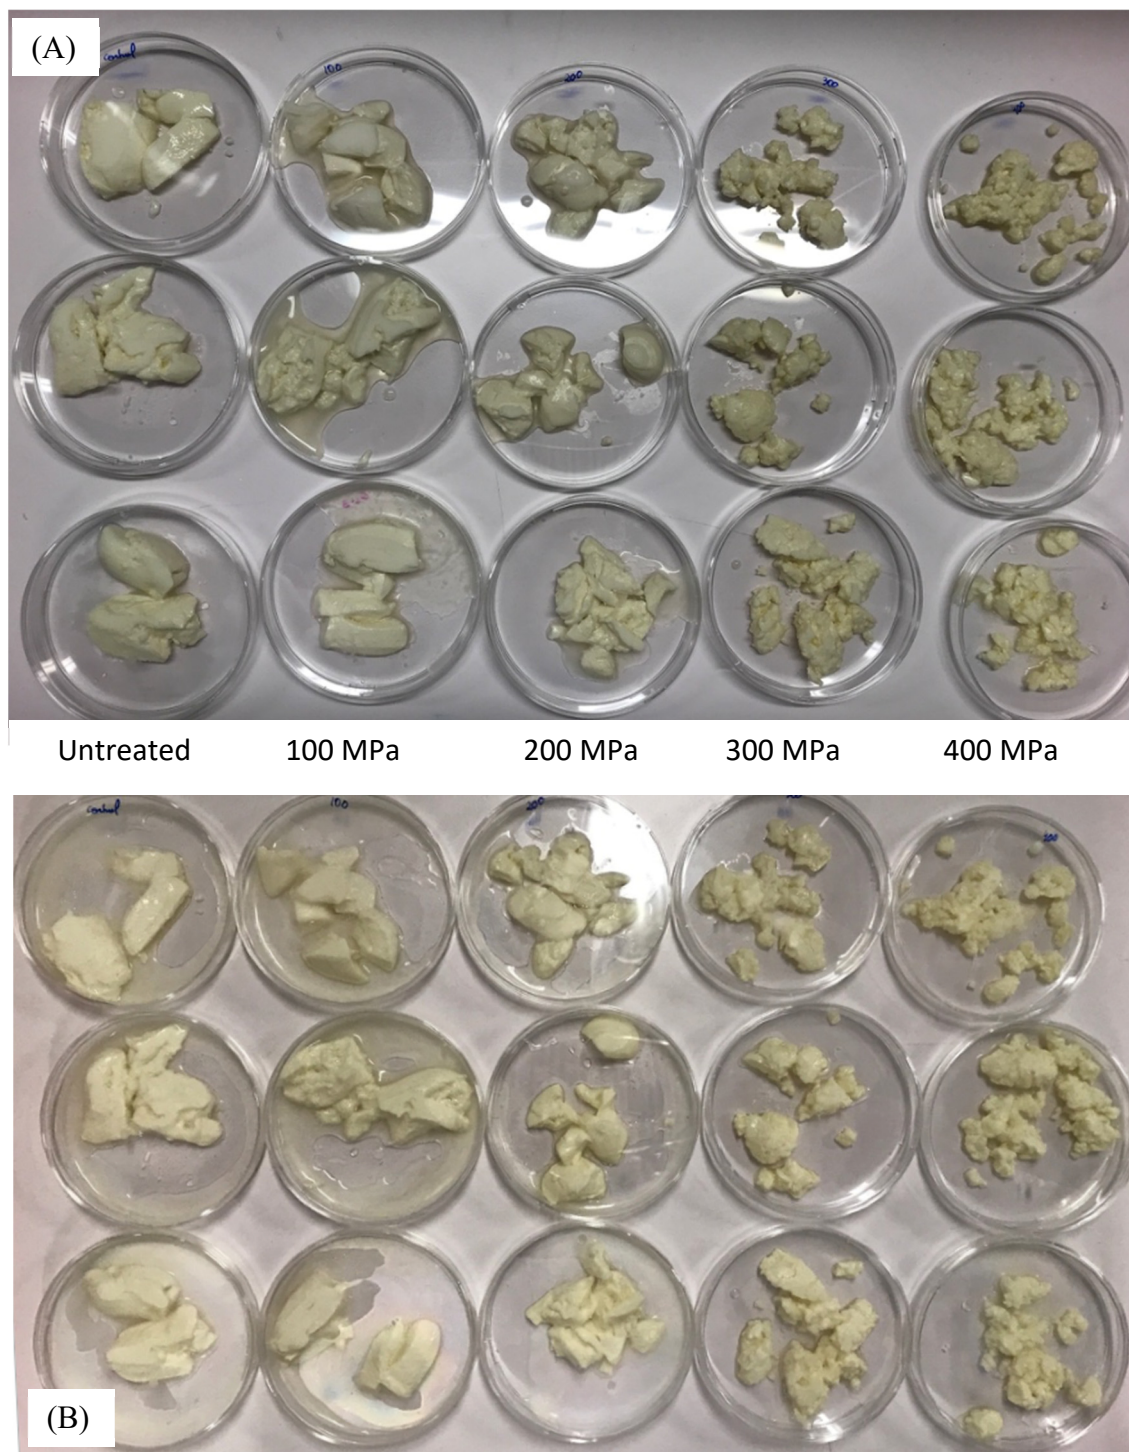

**Figure S3.** Second screening: curds obtained from milk HPP at 100, 200, 300 and 400 MPa for 5 min **(A)** 0 h after centrifugation and **(B)** after 24 h.

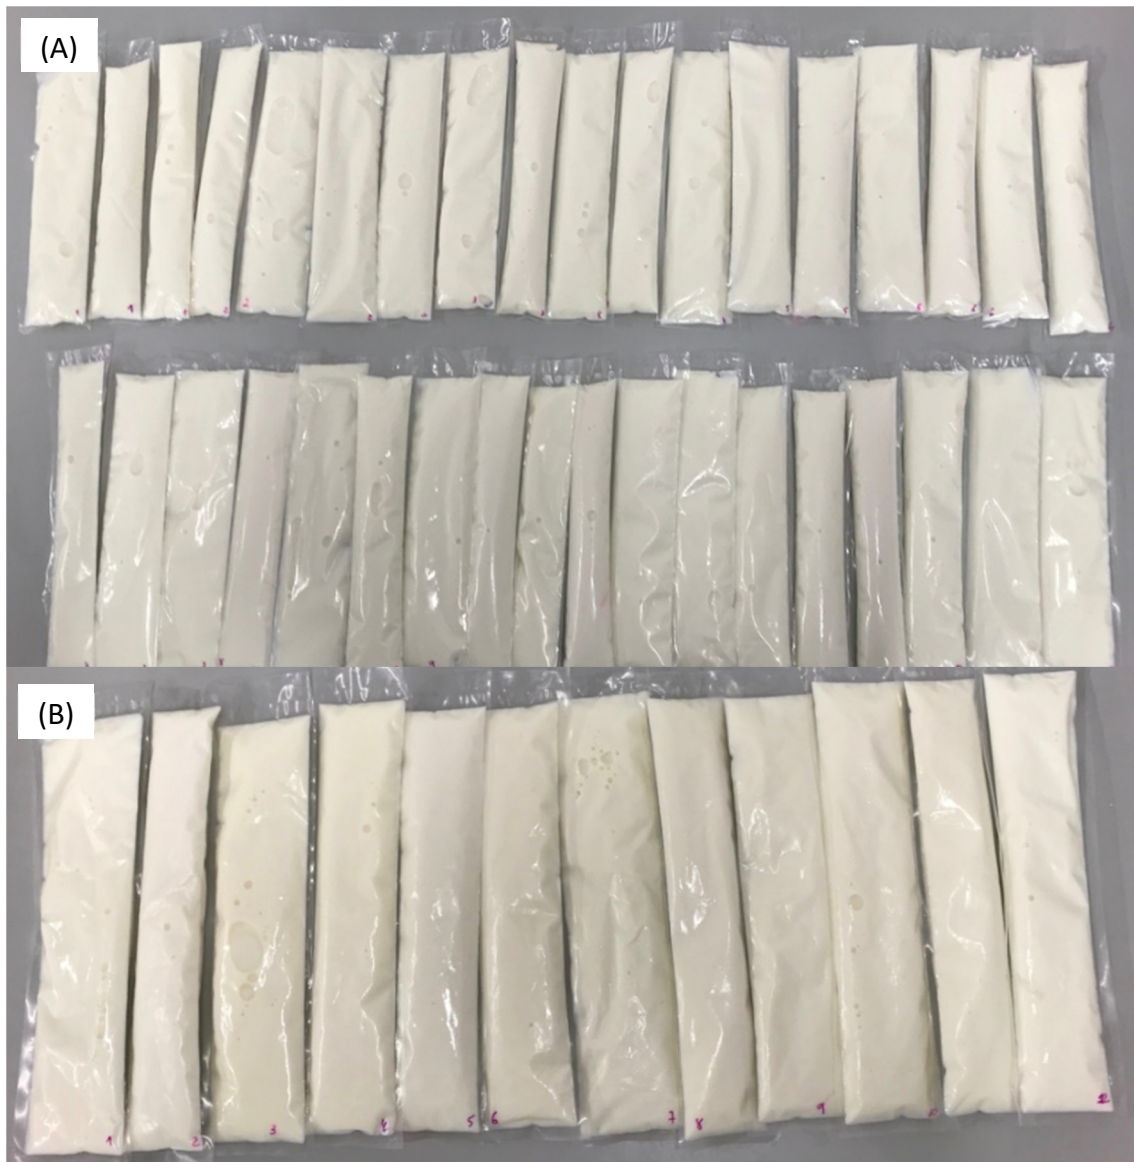

**Figure S4.** Surface Model: milk bags (A) before HPP treatment and (B) immediately after HPP treatments according to central composite design.

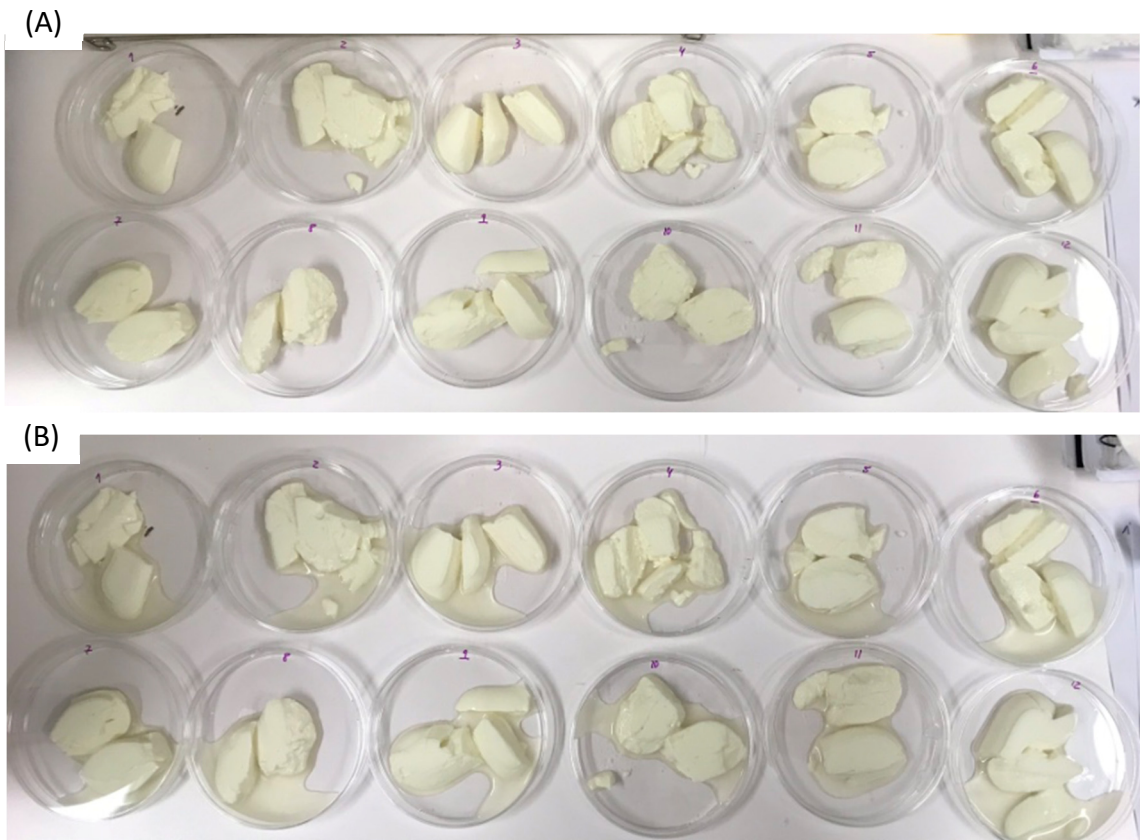

**Figure S5.** Surface Model: curds obtained from HPP milk pre-treated according to central composite design  
(A) 0 h after centrifugation and (B) after 2 h

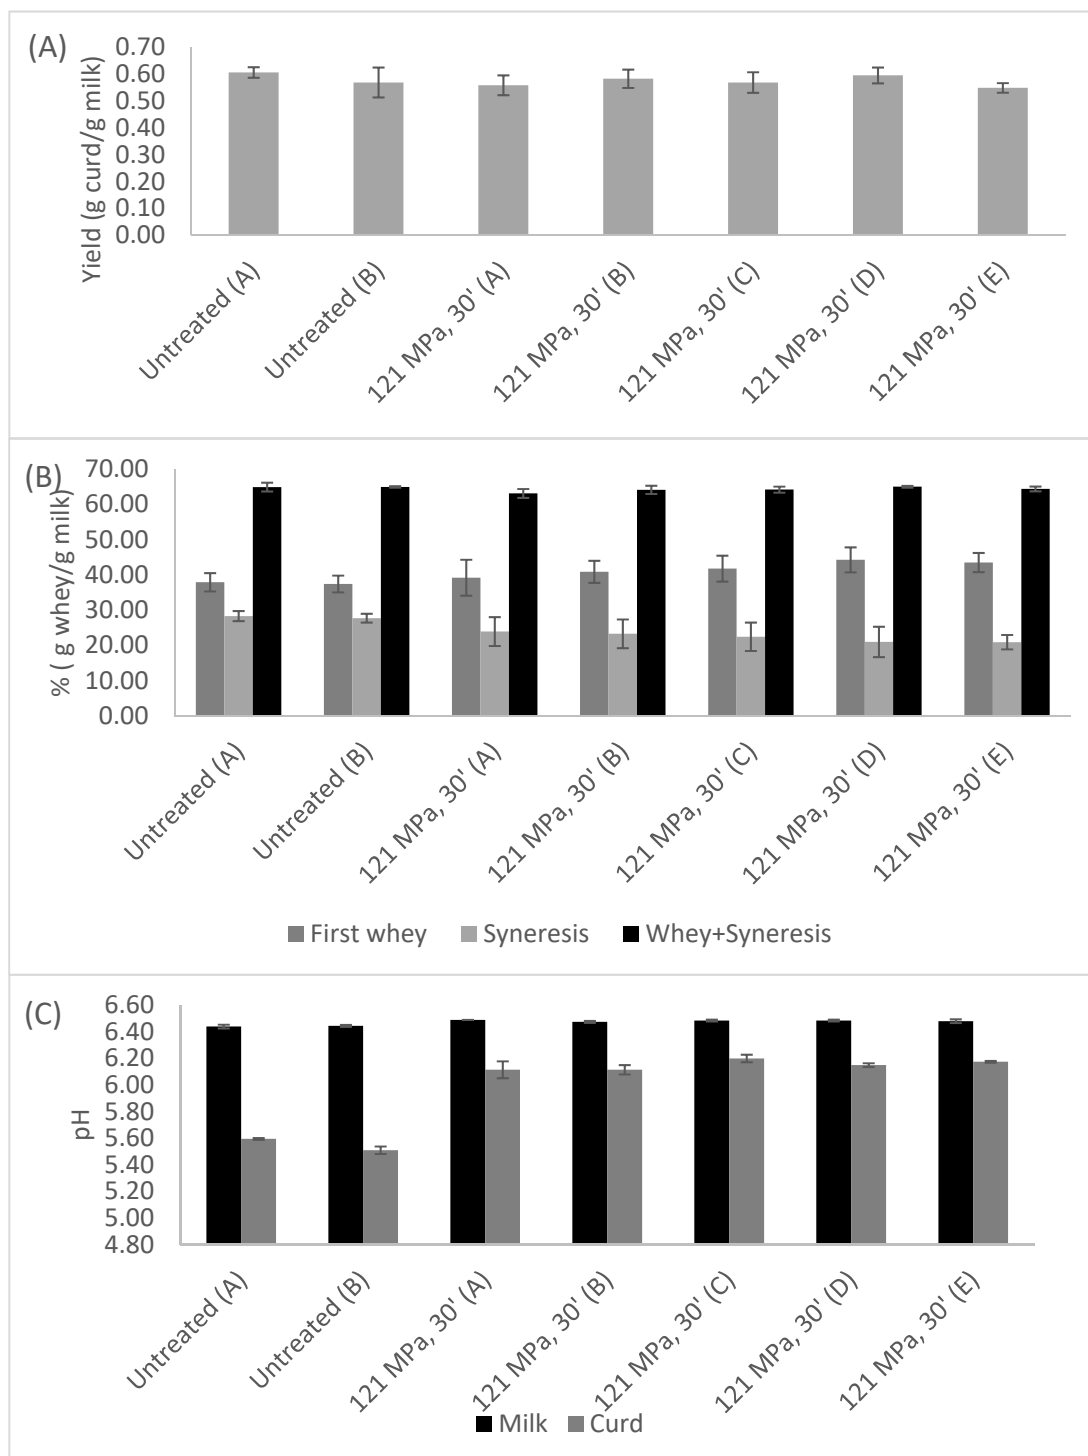

**Figure S6.** Validation model: (A) yield expressed in g of curd / g of milk; (B) whey release immediately after centrifugation: first whey; syneresis (24 h); whey+syneresis; (C) milk and curd pH-values from HPP milk pre-treated.
